# Brief Communication

## Title

High-throughput, image-based flow cytometry and clustering method for phenotyping heterogeneous cell populations

## Authors

Robert Peuß<sup>1,†</sup>, Andrew C. Box<sup>1,†,\*</sup>, Alice Accorsi<sup>1,2,†</sup>, Christopher Wood<sup>1</sup>, Alejandro Sánchez Alvarado<sup>1,2,#</sup>, & Nicolas Rohner<sup>1,3,#</sup>

<sup>†</sup>These authors contributed equally to this study

<sup>#</sup>These authors share senior authorship

\*Author for correspondence: Andrew C. Box ([acb@stowers.org](mailto:acb@stowers.org))

## Affiliation

<sup>1</sup>Stowers Institute for Medical Research, 1000 East 50th Street, Kansas City, MO 64110, United States

<sup>2</sup>Howard Hughes Medical Institute, Stowers Institute for Medical Research, 1000 East 50th Street, Kansas City, MO 64110, United States

<sup>3</sup>Department of Molecular & Integrative Physiology, KU Medical Center, Kansas City, KS 66160, United States.

## Abstract

Image-based cell profiling has become a common tool to identify phenotypic changes in cells exposed to various stimuli. To apply this approach to any research organism, we developed Image3C (Image-Cytometry Cell Classification), a tool that enables clustering of single cells based on their intrinsic phenotypic features by combining image-based flow cytometry with cell cluster analysis. We conducted a morphology analysis of hematopoietic tissue from zebrafish and a phagocytosis experiment. Here, Image3C could identify major hematopoietic cell lineages and, in addition, cells with specific functions, which abundance can be statistically compared between different treatments. To test the versatility of Image3C, we also clustered hemocytes of the apple snail *Pomacea canaliculata* obtaining results consistent with those collected by classical histochemical approaches. These experiments illustrate how Image3C can be used to classify and visualize heterogenous cell population obtained from either invertebrates or vertebrates without the need of antibodies or molecular databases.

## Main text

Modern technologies used to analyze individual cells and subsequently cluster them based on morphology, cell surface protein expression or transcriptome similarities are powerful methods for high-throughput analyses of biological processes at single cell-resolution. Recent advances in image-based cell profiling and single cell RNA-Seq (scRNA-Seq) allow quantification of phenotypic differences in cell populations and comparisons of cell type composition between samples<sup>2</sup>. While studies that use traditional research organisms (*e.g.* mouse, rat, human or fruit fly) benefit from these methods due to the availability of mature genomic platforms and established antibody libraries, the lack of such resources in non-traditional organisms prevents extensive use of single-cell based methods to interrogate their biology. In these cases, classical histochemical methods are often used to identify and characterize specific cells, but the quantification analysis of specific cell types can be affected by both observer bias<sup>3</sup> and a dearth of quantitative frameworks for making determination of cell classes.

To make the analysis of cell heterogeneity accessible to research organisms lacking genetic platforms or extensive species-specific reagents, we developed Image3C. Our method analyzes, visualizes and quantifies the composition of cell populations by using cell-intrinsic features and generic, non-species-specific fluorescent probes (*e.g.*, Draq5 or other vital dyes), thus eliminating observer bias. Image3C is an extremely versatile method that is virtually applicable to any research organism from which dissociated cells can be obtained. By taking advantage of morphology and/or function-related fluorescent probes, Image3C can analyze single cell suspensions derived from any experimental design and identify different constituent cell populations. Image3C combines modern high-throughput data acquisition through image-based flow cytometry, advanced clustering analysis and statistics to compare the cell composition between different samples.

The general workflow of Image3C is presented in Fig. 1 using hematopoietic tissue from the zebrafish, *Danio rerio*. We tested whether Image3C can identify homogeneous and biologically meaningful clusters of hematopoietic cells by analyzing only intrinsic morphological and fluorescent features, such as cell and nuclear size, shape, darkfield (side scatter, SSC) signal and texture. Each sample from 8 adult fish was stained and run on the ImageStream<sup>®</sup>X Mark II (Amnis Millipore Sigma) and individual cell images were collected (Fig. 1a). Feature intensities from both morphological and fluorescent features, such as cell size and nuclear size, were extracted from the cell images using IDEAS software (Amnis Millipore) (Fig. 1a, Table S1 for feature description, Supplemental Methods). The Spearman's correlation values for each pair of features were calculated using all cell events (*i.e.* cell images) of a representative sample and used to trim redundant features<sup>2</sup> (Fig. 1a). The Spearman's correlation of the mean values of remaining features were then used to identify outliers among sample replicates (Fig. 1a). While morphological features do not require any normalization, fluorescence intensity features often must be transformed using a 'logicle' transformation (R flowCore package)<sup>4</sup> to improve homoscedasticity (homogeneity of variance) of distributions. Then, prior to clustering, fluorescent intensity features derived from DNA staining were normalized using the gaussNorm function from the flowStats R package<sup>5</sup> to align all 2N and 4N peak positions (Fig. 1a). These feature processing steps must be done independently for each research organism because of the high variability between data and distributions. A final set of feature intensities was used for clustering the events using X-Shift algorithm<sup>1</sup>. Dimensionality reduction and visualization of resultant clusters and events were achieved by generating force directed layout graphs (FDL, Fig. 1b) using a combination of Vortex clustering environment<sup>1</sup> and custom R scripts, respectively (Supplemental Methods). Visualization of the cell images by cluster was done using FCS Express (version 6 Plus) and its integrated R

Add Parameters Transformation feature (Fig. 1b, Supplemental Methods). Additionally, cluster feature averages (*i.e.* the mean value of each feature for each cluster) provide a deeper understanding about the morphological features that differ between cells belonging to separate clusters and the cluster distribution can be used to derive the most significant contribution to cluster variance from the feature set (Fig. 1b). Finally, statistical analysis to compare cell counts per cluster between potential treatments is integrated in Image3C and is done using negative binomial regression (Supplemental Methods). As seen in Fig. 1b, Image3C can distinguish between the major classes of hematopoietic cells in zebrafish (see Data File 1 and 2) that were described using standard flow cytometry sorting and morphological staining approaches<sup>6</sup>. It is noteworthy that this method can clearly identify dead cells and debris (Fig. 1b). The possibility to identify and separate these events from the intact and alive cells allows to optimize experimental conditions and cell treatment protocols in order to minimize cell death and run the subsequent analysis only on the remaining events. In addition, Image3C can identify cells with outstanding morphological features, such as neutrophils or erythrocytes (see Fig. 1b).

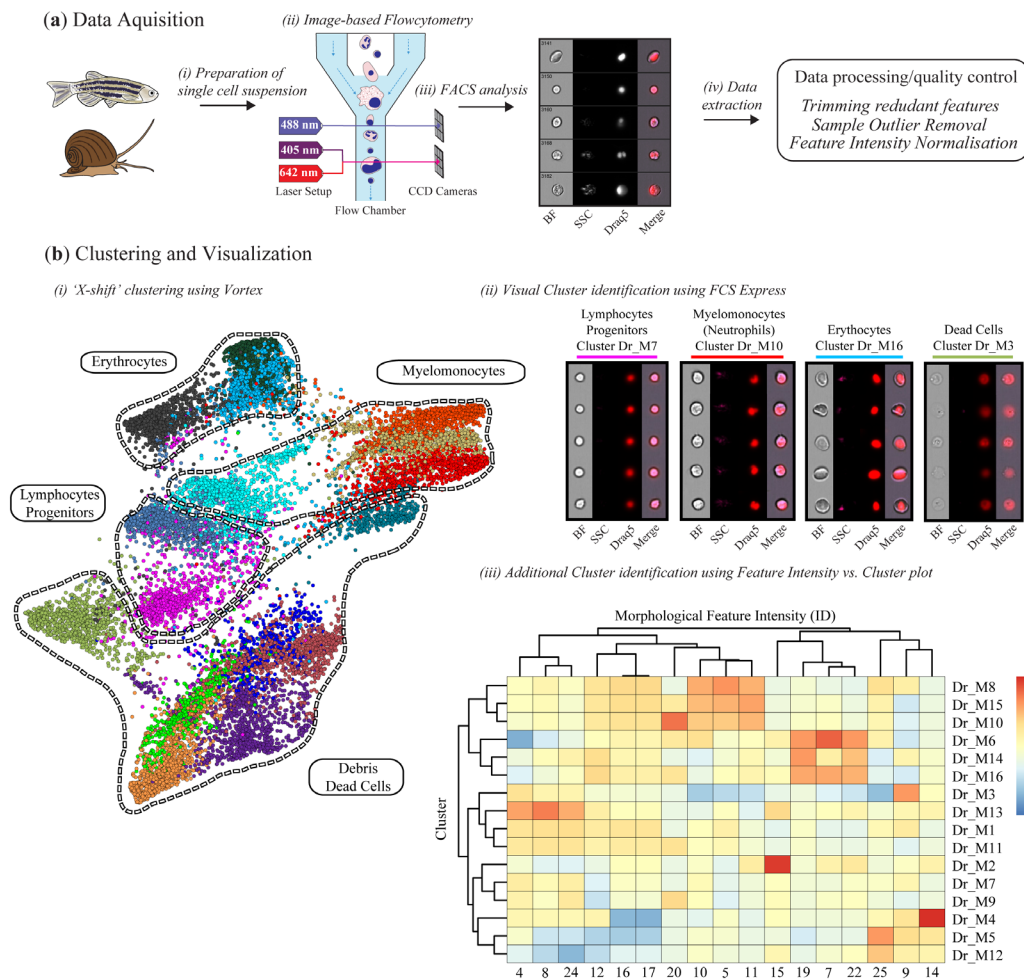

Fig. 1 | Schematic representation of Image3C using hematopoietic tissue from zebrafish as an example for cell clustering based on morphological features. (a) (i) Hematopoietic tissue from 8 fish (or any single suspension of cells of interest) obtained from zebrafish (or any research organism) is prepared for image-based flowcytometric analyses (ii) and run on the ImageStream<sup>®</sup> Mark II. (iii) Standard gating of nucleated events and manual out-gating of most erythrocytes using IDEAS software is followed by (iv) the extraction of intensities for intrinsic morphological and fluorescent features, normalization and quality controls. (b) (i) Using X-shift clustering<sup>1</sup> in the Vortex environment cell images are clustered based on the intrinsic feature intensities and visualized as a force directed layout (FDL) graph. (ii) R integration<sup>7</sup> in FCS Express software allows the visualization of all the cell images belonging to a specific cluster to evaluate the homogeneity of the cluster and determine phenotype/function of the cells. (iii) In addition to data visualization, Image3C provides a variety of options for integrated data plotting, such as the Spearman's correlation plot of feature intensities per cluster for identification of similarities and differences between cells in different clusters (see Table S1 for details).

Next, we sought to determine whether Image3C can be used to detect clusters whose relative abundance significantly changes after specific experimental treatments. We performed a standard phagocytosis assay using hematopoietic cells from zebrafish, which were stained with Draq5 and incubated with CellTrace Violet labeled *Staphylococcus aureus* (CTV-S. aureus) and dihydrorhodamine-123 (DHR), a reactive oxygen species that becomes fluorescent if oxidized

(Supplemental Methods). The DHR was used as a proxy for cell activation to report oxidative bursting as a consequence of phagocytosis. As control, we inhibited phagocytosis through cytoskeletal impairment by CCB incubation or through incubation at lower temperature (i.e. on ice).

Events collected on the ImageStream<sup>®</sup>X Mark II (Amnis Millipore Sigma) were analyzed with our pipeline and clustered in 26 distinct clusters using intensities of morphological and fluorescent features (see Table S1), such as nuclear staining, *S. aureus* phagocytosis and DHR positivity (Fig. 2a). Professional phagocytes were defined by their ability to take up CTV-*S. aureus* and induce a reactive oxygen species (ROS) response (DHR positive)<sup>8</sup>. To compare between samples incubated with CTV-*S. aureus* and the respective control samples we used the statistical analysis pipeline from Image3C, which is based on a negative binomial regression model (Fig. 2b). In zebrafish, professional phagocytes are mainly granulocytes and monocytic cells and can be discriminated from each other based on morphological differences (i.e. cell size, granularity and nuclear shape)<sup>9</sup>. By combining the statistical analyses and the visual inspection of the cell galleries (Data File S3) and intensity of morphological and fluorescent intensities (Data File S2), we identified 4 clusters of professional phagocytes: granulocytes within cluster *Dr4*, *Dr12* and *Dr13* and monocytic cells in cluster *Dr21* (Fig. 2a, 2b). The morphology of cells in cluster *Dr12* is characteristic of phagocytic neutrophils (Fig. 2a) that become adhesive and produce extracellular traps upon recognition of bacterial antigens<sup>10</sup>. Overall relative abundance of professional phagocytes is 5-

10% (Fig. 2c), which is in line with previous studies that estimated the number of professional phagocytes in hematopoietic tissue of adult zebrafish using classical morphological approaches<sup>9</sup>.

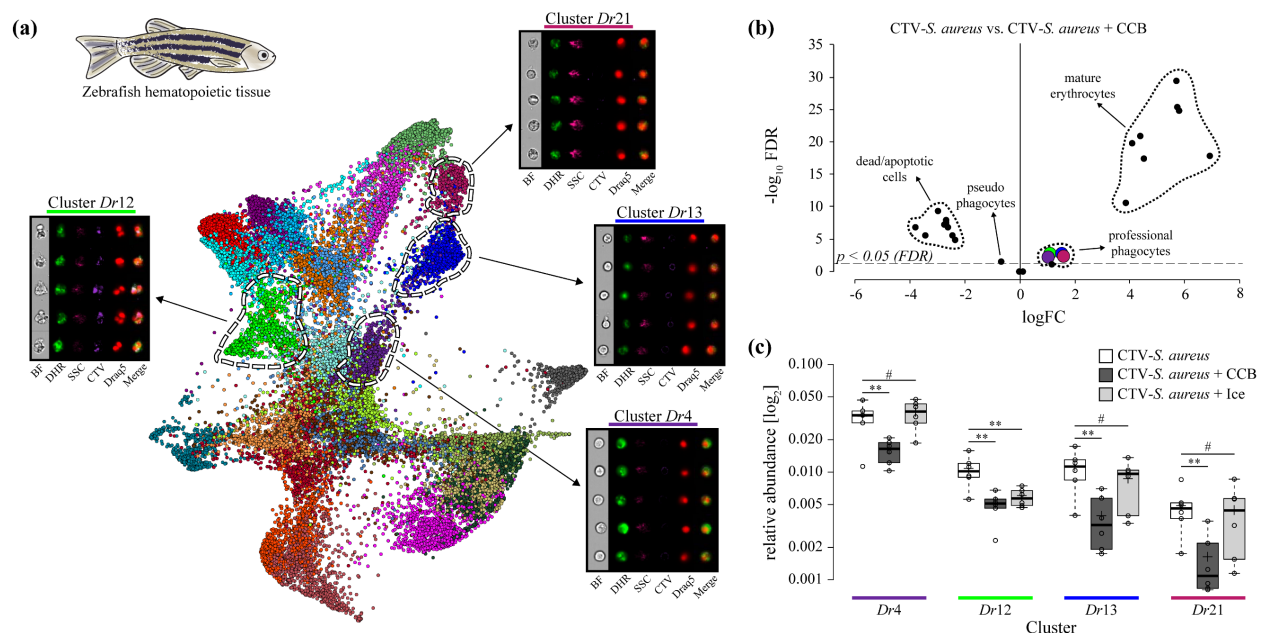

Fig. 2 | Identification of phagocytes in *D. rerio* hematopoietic cells using Image3C based on intrinsic feature intensities. (a) FDL graph of cluster data using X-shift<sup>1</sup>. Each color represents a unique cell cluster. Galleries of cluster containing professional phagocytes are shown. Merge represents overlay of DHR, CTV and Draq5 channels. (b) Volcano Plot illustrating comparison between treatment sample (hematopoietic cells + CTV-S. aureus) and CCB control sample (hematopoietic cells + CTV-S. aureus + 0.08 mg/mL CCB). Plotted is the log fold change (logFC) in relation to the FDR corrected p-value (-log<sub>10</sub>) of each individual cluster calculated with negative binomial regression model. Clusters containing professional phagocytes are highlighted in the respective color as presented in (a). (c) Box plot of relative abundances of cells within cluster containing professional phagocytes in treatment sample (hematopoietic cells + CTV-S. aureus), CCB control sample (hematopoietic cells + CTV-S. aureus + 0.08 mg/mL CCB) and ice control sample (hematopoietic cells + CTV-S. aureus incubated on ice). Statistically significant differences are calculated using the negative binomial regression model between the treatment and control sample (Supplemental Methods). \*\* indicates  $p \leq 0.01$  and # indicates not significantly different after FDR.

It is interesting to note that CCB selectively affects cell viability based on cell identity (Fig. 2b). We found all erythrocyte containing clusters had a significantly higher count in the CTV-S. aureus samples when compared to the CTV-S. aureus + CCB controls (Fig. 2b). Cluster analysis revealed that erythrocytes are almost absent in samples incubated with CCB (Data File S2), while there is a significant increase of dead and apoptotic cells (Fig. 2b, Table S2). Both outcomes are likely due to reduced cell viability of erythrocytes upon CCB incubation. Moreover, we excluded the possibility of higher cell death in the professional phagocytes upon CCB incubation, since we

found here pseudo-phagocytes (phagocytes with DHR response but no internalized CTV-*S. aureus*) to be significantly more abundant (Fig. 2b, Table S2).

Next, we inhibited phagocytosis by incubating the hematopoietic cells on ice (Supplemental Methods) and compared the effectiveness of inhibition with the CCB control (Fig. 2c, Table S3). We found that temperature inhibition of phagocytosis only affects adhesive neutrophils (cluster *Dr12*), probably through the inhibition of adhesion, while CCB effectively blocks phagocytosis in all professional phagocytes in zebrafish hematopoietic tissue (Fig. 2c).

To test the versatility of HIFlo-CC, we repeated the experiments using hemolymph samples from the emerging invertebrate model *Pomacea canaliculata*. For morphological examination of the cellular composition of the hemolymph, respective tissue from five adult animals were stained with Draq5 (DNA dye) and run on the ImageStream<sup>®</sup> Mark II (Amnis Millipore Sigma) (Supplemental Methods). From the cell images, Image3C analyzed 15 morphological and 10 fluorescent features and identified 9 cell clusters (Fig. 3a). Two of these clusters are constituted by cell doublets, debris and dead cells (clusters *Pc5* and *Pc8*). (Fig. 3c). Concerning the other clusters, we grouped them into 2 main categories based on both cell images and previous data<sup>11</sup> (Data File S4). The first category includes small blast-like cells (cluster *Pc4*) and intermediate cells (clusters *Pc2* and *Pc3*) with high nuclear-cytoplasmic ratio. These cells morphologically resemble the Group I hemocytes previously described using a classical morphological approach<sup>11</sup>. The second category is constituted by larger cells with lower nuclear-cytoplasmic ratio and abundant membrane protrusions (clusters *Pc1*, *Pc6*, *Pc7* and *Pc9*). Likely, these cells correspond to the previously described Group II hemocytes that include both granular and agranular cells<sup>11</sup>. To identify which of these clusters are enriched with granular cells, the intensities of the morphological features related to cytoplasm texture provided by Image3C were compared between

the clusters of this category (Fig. 3b, Data File S4). Cluster *Pc6* was identified as the one containing the granular hemocytes. The clusters obtained by Image3C, not only were homogeneous and biologically meaningful, but were also consistent with published *P. canaliculata* hemocyte classification obtained by classical morphological methods<sup>11</sup>. Such remarkable consistency has been observed in terms of identified cell morphologies and their relative abundance in the population of circulating hemocytes (Fig. 3c, Data File S4). For example, the relative abundance of the previously reported small blast-like cell is 14.0% a value indistinguishable from the corresponding cluster *Pc4* of 13.8%. Similarly, the category of larger hemocytes, or Group II hemocytes represents 80.4% of the circulating cells as measured by traditional morphological methods<sup>11</sup>, while clusters *Pc1*, *Pc6*, *Pc7* and *Pc9* represent 72.4% of the events analyzed with Image3C. A sub-set of these cells are the granular cells (cluster *Pc6*), which correspond to 7.7% of all hemocytes by classical histological methods<sup>11</sup> and 8.9% Image3C. The intermediate cells (clusters *Pc2* and *Pc3*) are less well represented in both approaches, with a relative difference in abundance of 5.6% versus 10.6% of the manually and Image3C analyzed events, respectively. However, such difference is likely best explained by the remarkable difference in both, the number of cells and number of features considered for the analyses. Only a few hundred hemocytes were ocularly analyzed based on cell diameter and nuclear-cytoplasmic ratio using traditional histological methods<sup>11</sup>, while the automated pipeline used in this study analyzed 10,000 nucleated events with 25 cell intrinsic features each cell for a single sample. Hence, Image3C represents an unprecedented increase in the accuracy of hemocyte type identification over traditional histological methods.

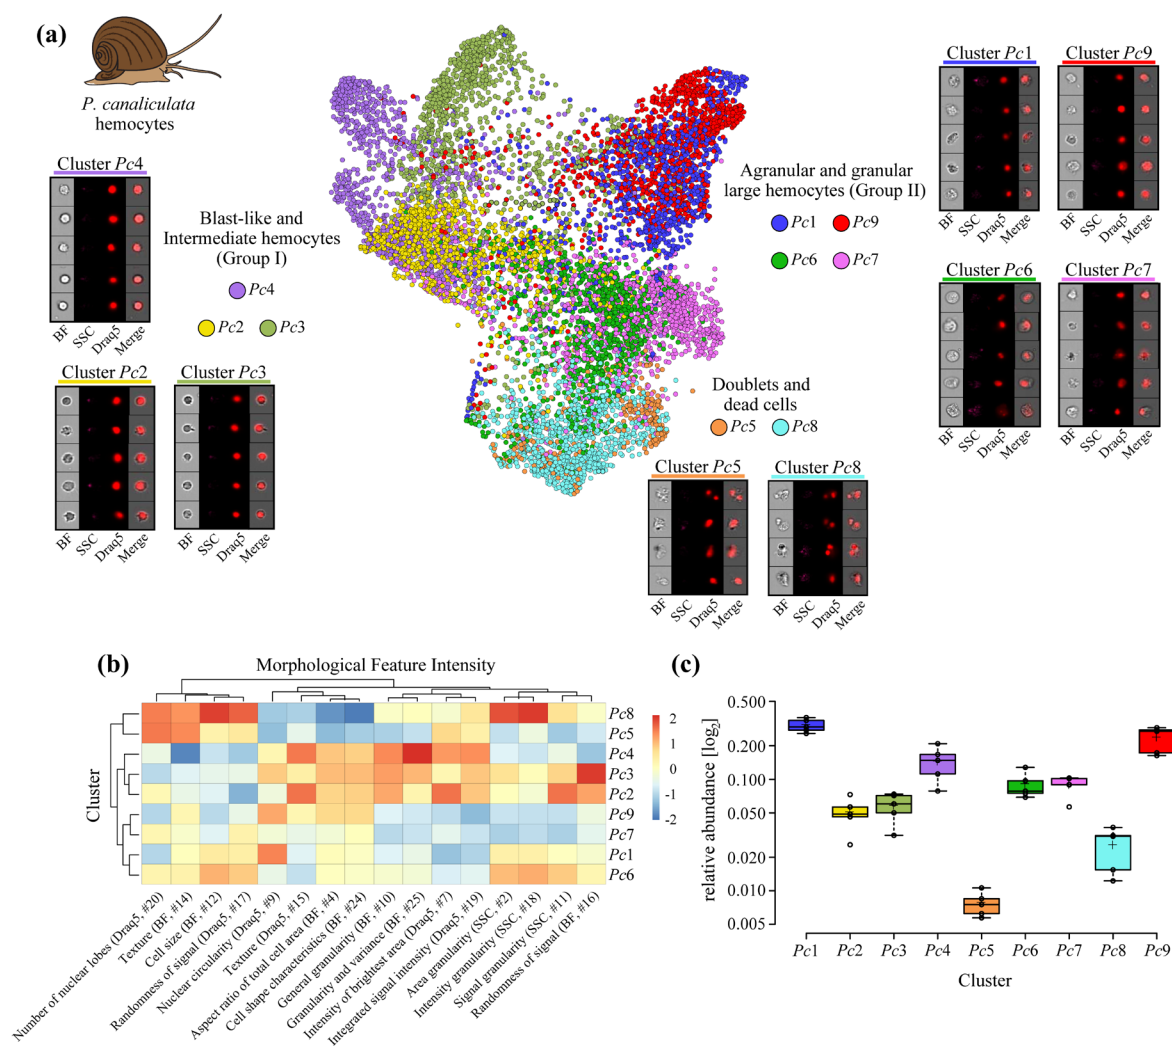

**Fig. 3 | Analysis of *P. canaliculata* hemocyte population using the Image3C pipeline based only on intrinsic morphological features of the cells. (a)** FDL graph is used to visualize the 9 identified clusters. Each color represents a unique cell cluster and representative images (galleries) of the cells included in each cluster are shown. Merge represents the overlay of brightfield (BF), side scatter signal (SSC) and Draq5 signal. **(b)** The Spearman's correlation plot of morphological feature intensities per cluster allows the comparison of specific morphological aspects, such as granularity, between cells belonging to different clusters (see Table S1 for details). **(c)** Box plot of event relative abundance within each cluster following the same color-code used in Fig. 2a. Clusters Pc5 and Pc8, constituted by duplets and dead cells, are those with the lowest number of events, validating the protocol used to prepare these samples.

In addition, we performed the same phagocytosis experiment with hemocytes from *P. canaliculata* as done for hematopoietic cells from zebrafish (Data File S2, S5, Table S4, S5). Here, we inhibited phagocytosis using either an EDTA treatment or incubation on ice. We identified two professional phagocyte clusters (cluster 27430 and 27442) (Data File S5), both constituted by large

hemocytes (Group II), but with a different DHR signal intensity (ROS response) upon bacteria exposure (cluster 27430 high DHR signal, cluster 27442 low DHR signal, see Data File S2 and S5). Similar to the CCB inhibition control in the zebrafish phagocytosis experiment, EDTA is more effective in inhibiting phagocytosis than temperature since both professional phagocytic clusters (cluster 27430 and 27442) contain significantly higher numbers of cells in the phagocytosis treatment compared to the EDTA control (Table S4). In the phagocytosis treatment compared to the ice control, however, only cluster 27442 has a significantly higher relative abundance of professional phagocytes (Table S5).

The data analysis with Image3C clearly highlighted that the classical phagocytic inhibitors, CCB or EDTA, commonly used in controls for phagocytosis experiments, result in a drastic change of cell morphology, a consequence not easily detectable by other methods and often overlooked. In the present work, these changes significantly modified the overall cell cluster number and distribution, and it must be taken into consideration in any study of morphological features of cells with phagocytosing properties. Furthermore, when determining differences between experimental treatments, Image3C necessarily combines images and data from all the treatments for clustering (Supplemental Methods). Therefore, experiments meant to classify and analyze only innate cell morphologies present in a tissue should be carried out separately from experiments where one or more treatments are likely to significantly affect cell morphology in an unanticipated manner (*e.g.* CCB or EDTA incubation). This would prevent treatment effects being conflated with innate morphology differences among unperturbed cell types.

In summary, we have developed a powerful new method to analyze the composition of any cell population obtained from any research organism of interest at single cell resolution without the need for species-specific reagents such as fluorescently tagged antibodies (multicolor

immunophenotyping) or a draft genome (scRNA-Seq). We showed how Image3C can cluster cell populations based on morphology and/or function and highlight changes in the cell population composition due to experimental treatments. This tool is extremely versatile and can be applied to any cell population of interest and included in any experimental design. In addition, given the recent advancement in image-based flow cytometry that enables image capturing together with cell sorting<sup>12</sup>, a scRNA-Seq approach in combination with the Image3C pipeline would enable the simultaneous analysis of both phenotypic and genetic properties of a cell population at single cell resolution. Image3C is freely available from the Github repository<sup>13</sup>.

# Acknowledgements

The authors would like to thank Jeff Haug for the support on the development of the Image3C pipeline. We kindly acknowledge Hua Li for her assistance on the statistical analysis and we also thank the Laboratory Animal Services and the Aquatics Facility at the Stowers Institute for Medical Research for animal husbandry. This work was supported by institutional funding to ACB, CW, ASA and NR. ASA is a Howard Hughes Medical Institute Investigator. RP was supported by a grant from the Deutsche Forschungsgemeinschaft (PE 2807/1-1). AA was supported by the Emerging Models grant from the Society for Developmental Biology (SDB) and the postdoctoral fellowship from the American Association of Anatomists (AAA).

# Author Contributions

RP, ACB and AA conceived and designed the study with input from ASA and NR. RP performed *D. rerio* experiments. AA performed *P. canaliculata* experiments. ACB conceived and wrote the

Image3C pipeline and associated R-scripts with input from CW. RP, ACB, AA and CW analyzed and interpreted the data. RP, AA and ACB wrote the paper. All authors read and edited the paper.

# Data availability statement

All original data underlying this manuscript can be accessed from the Stowers Original Data Repository at <http://www.stowers.org/research/publications/libpb-1390>. Image3C code and description is available at <https://github.com/stowersinstitute/LIBPB-1390-Image3C>.

# References

- Samusik, N., Good, Z., Spitzer, M. H., Davis, K. L., and Nolan, G. P., *Nat. Methods* **13** (6), 493 (2016).
- Caicedo, J. C. *et al.*, *Nat. methods* **14** (9), 849 (2017).
- van der Meer, W., Scott, C. S., and de Keijzer, M. H., *Clin. Chem. Lab. Med.* **42** (4), 371 (2004).
- Hahne, F. *et al.*, *BMC Bioinformatics* **10**, 106 (2009).
- Hahne, F. *et al.*, *CytometryA* **77** (2), 121 (2010).
- Traver, D. *et al.*, *Nat. Immunol* **4** (12), 1238 (2003).
- The R Core Team, R: A language and environment for statistical computing (R Foundation for Statistical Computing, Vienna, Austria, 2014).
- Rabinovitch, M., *Trend. Cell Biol.* **5** (3), 85 (1995).
- Wittamer, V., Bertrand, J. Y., Gutschow, P. W., and Traver, D., *Blood* **117** (26), 7126 (2011).
- Palic, D., Andreasen, C. B., Ostojic, J., Tell, R. M., and Roth, J. A., *J. Immunol. Methods* **319** (1-2), 87 (2007).
- Accorsi, A., Bucci, L., de Eguileor, M., Ottaviani, E., and Malagoli, D., *Fish Shellfish Immunol.* **34** (5), 1260 (2013).
- Nitta, N. *et al.*, *Cell* **175** (1), 266 (2018).
- Stowers Institute, LIBPB-1390-Image3C, Available at <https://github.com/stowersinstitute/LIBPB-1390-Image3C>, (2019).

## Online Supplemental Methods

### **Collection of zebrafish whole kidney marrow (WKM)**

Twelve-month-old, wild type, female, adult zebrafish were euthanized with cold 500 mg/L MS-222 solution for 5 min. Kidneys were dissected as previously described<sup>6</sup> and then transferred to 40 µm cell strainer with 1 mL of L-15 media containing 10% water, 10 mM HEPES and 20 U/mL Heparin (L-90). Cells were gently forced through the cell strainer with the plunger of a 3 mL disposable syringe. The strainer was washed once with 1 mL of L-90 and the resulting single cell solution was centrifuged at 500 rcf at 4 °C for 5 min. The supernatant was discarded, and the cells were resuspended in 1 mL of L-15 media containing 5 % fetal calf serum (FCS), 4 mM L-Glutamine, and 10,000 U of both Penicillin and Streptomycin (L-90 media). The cells were counted after a 1:20 dilution on the EC-800 flow cytometer (Sony) using scatter properties.

### **Collection of apple snail hemocytes**

Specimens of the apple snail *Pomacea canaliculata* (Mollusca, Gastropoda, Ampullariidae) were maintained and bred in captivity, in a water recirculation system filled with artificial freshwater (2.7 mM CaCl<sub>2</sub>, 0.8 mM MgSO<sub>4</sub>, 1.8 mM NaHCO<sub>3</sub>, 1:5000 Remineralize Balanced Minerals in Liquid Form [Brightwell Aquatics]). The snails were fed twice a week and kept in a 10:14 light:dark cycle. Seven wild type adult snails, 7-9 months old and with a shell size of 45-60 mm were starved for 5 days before the hemolymph collection<sup>11</sup>. The withdrawal was performed applying a pressure on the operculum and dropping the hemolymph directly into an ice-cold tube. The hemolymph was not pooled but the cells collected from each animal were individually analyzed. The hemolymph was immediately diluted 1:4 in Bge medium + 10% fetal bovine serum (FBS) and then centrifuged at 500 rcf for 5 min. The pellet of cells was resuspended in 100 µl of

Bge medium + 10% FBS. The Bge medium (also known as *Biomphalaria glabrata* embryonic cell line medium) is constituted by 22% (v/v) Schneiders's Drosophila Medium, 4.5 g/L Lactalbumin hydrolysate, 1.3 g/L Galactose, 0.02 g/L Gentamycin in MilliQ water, pH 7.0.

## Morphology Assay

The *P. canaliculata* hemocytes were stained with 5  $\mu$ M Draq5 (Thermo Fisher Scientific) for 10 min, moved to ice and subsequently run one by one on the ImageStream<sup>®</sup>X Mark II (Amnis Millipore Sigma), where 10,000 nucleated and focused events were recorded for each sample.

*D. rerio* hematopoietic cells obtained from 8 animals were plated at  $4 \times 10^5$  cells/well in a 96-well plate in 200  $\mu$ L of medium and incubated for 3 h at room temperature. Cells were stained with 5  $\mu$ M Draq5 (Thermo Fisher Scientific) for 10 min and subsequently run on the ImageStream<sup>®</sup>X Mark II (Amnis Millipore Sigma), where 10,000 nucleated and focused events were recorded for each sample. For HIFlo-CC analysis, erythrocytes were out-gated to increase number of immune relevant cells and to prevent over clustering. The latter is due to the fact that erythrocytes from fish are nucleated and their biconcave shape result in different morphological feature intensities only depending on their orientation during image acquisition.

## Phagocytosis assay

For both animals, cells from a single cell suspension were plated in a 96-well plate at a concentration of  $4 \times 10^5$  cells/well in 200  $\mu$ L of medium and incubated with  $2 \times 10^7$  CTV-coupled *Staphylococcus aureus*/well (Thermo Fisher Scientific) for 3 h at room temperature. As control for phagocytosis the cells were either incubated with CTV-*S. aureus* on ice or with CTV-*S. aureus* in the presence of 0.08 mg/mL cytochalasin B (CCB) for zebrafish cells or 30 mM EDTA and 10

mM HEPES for apple snail cells<sup>14</sup>. After 2 h and 30 min we added 5  $\mu$ M dihydrorhodamine-123 (DHR) (Thermo Fisher Scientific) to the cell suspension to stain cells positive for reactive oxygen species (ROS) production. To control for this treatment with DHR, we incubated the cells with 10 ng/mL phorbol 12-myristate 13-acetate (PMA) to artificially induce ROS production. At 2 h and 50 min since the beginning of incubation with CTV-*S. aureus*, all the samples were stained with 5  $\mu$ M Draq5 for 10 min. After 3 h incubation with bacteria, cells were moved and stored on ice and subsequently run on the ImageStream<sup>®</sup>X Mark II (Amnis Millipore Sigma), where 10,000 nucleated and focused events were recorded for each sample.

### **Data collection on ImageStream<sup>®</sup>X Mark II**

Following cell preparation, data were acquired from each sample on the ImageStream<sup>®</sup>X Mark II (Amnis Millipore Sigma) at 60x magnification, slow flow speed, using 633, 488 and 405 nm laser excitation. Bright field was acquired on channels 1 and 9. DHR (488 nm excitation) was collected on channel 2, CTV-*S. aureus* (405 nm excitation) on channel 7 and Draq5 (633 nm excitation) on channel 11. SSC was acquired on channel 6.

### **Data analysis**

Raw image data from the ImageStream<sup>®</sup>X Mark II system was compensated, background was subtracted, and features were calculated using IDEAS 6.2 software (Amnis/Millipore). Feature intensities for all cells and samples were then exported from IDEAS into FCS files for processing in R. See github repository and Table S1 for a full list of features used for each organism and a more detailed description of processing steps. Briefly, exported FCS files were processed in R<sup>7</sup> to trim redundant features with high correlation values, fluorescence intensity features were

transformed using the `estimateLogicle()` and `transform()` functions from the `flowCore` package<sup>4,15</sup>, and DNA intensity features were normalized to remove intensity drift between samples using the `gaussNorm` function from `flowStats`<sup>16</sup>. The processed data was exported from R<sup>7</sup> using `writeflowSet()` function in `flowCore` package<sup>4,15</sup>.

Data and clustering results were then imported into the Vortex clustering environment for X-shift k-nearest-neighbor clustering<sup>1</sup>. During the import into Vortex, all features were scaled to 1SD to equalize the contribution of features towards clustering. Clustering was performed in Vortex with a range of k values, typically from 5 to 150, and a final k value chosen using the ‘find elbow point for cluster number’ function in Vortex and with visual confirmation of the result that over or under-clustering did not occur. Force directed graphs of a subset of cells in each experiment’s file set were also generated in Vortex and cell coordinates in the resultant 2d space were exported along with graphml representation of the force directed graph. After clustering and generation of force directed graphs, tabular data was exported from Vortex that included a master table of every cell event and its cluster assignment and original sample ID, as well as a table of the average feature intensities for each cluster and counts of cells per cluster and per sample.

Clustering results were further analyzed and plotted in R<sup>7</sup> by merging all cell events and feature intensities with cluster assignments, and force directed graph X/Y coordinates. Using this merged data and the graphml file exported from Vortex, new force directed graphs were created per treatment condition using the `igraph` package<sup>17</sup> in R, statistical analysis of differences in cell counts per cluster by condition were performed using negative binomial regression of cell counts per cluster, plots of statistics results and other results generated (see github repository for details), and csv files containing cell and sample ID, feature intensities, X/Y coordinates in force directed and minimum spanning tree plots were exported for each sample in the experiment set for merging

results into daf files in FCS Express Plus version 6 (DeNovo software), which allowed visualization of cell images by cluster and by sub setting of regions within the force directed graphs.

Analysis of daf files was performed in FCS Express by opening daf files and using the “R add parameters” transformation feature to merge the csv files generated above with the daf file feature intensity and image sets. This allowed the generation of image galleries of cells within each cluster and additional analysis in the style of traditional flow cytometry (*i.e.*, gating on 2d plots of features of interest) to explore the clustering results and identify candidate clusters and populations of interest.

The full complement of R packages used includes flowCore<sup>4,15</sup>, flowStats<sup>16</sup>, igraph<sup>17</sup>, ggcyto<sup>18</sup>, ggridges<sup>19</sup>, ggplot2<sup>20</sup>, stringr<sup>21</sup>, hmisc<sup>22</sup> and caret<sup>23</sup>.

## **Statistic**

Negative binomial regression was performed on tables of cell counts per cluster, per sample and plots were generated using the edgeR package, which was developed for RNAseq analysis, but includes generally applicable and user-friendly wrappers for regression and modeling analysis and plotting of results.

## References

4. Hahne, F. *et al.*, *BMC Bioinformatics* **10**, 106 (2009).
6. Traver, D. *et al.*, *Nat. Immunol.* **4** (12), 1238 (2003).
7. The R Core Team, R: A language and environment for statistical computing (R Foundation for Statistical Computing, Vienna, Austria, 2014).
14. Cueto, J. A., Rodriguez, C., Vega, I. A., and Castro-Vazquez, A., *PloS one* **10** (4), e0123964 (2015).
15. Ellis, B. *et al.*, flowCore: flowCore: Basic structures for flow cytometry data. R package version 1.46.1. (2018).
16. Hahne, F., Gopalakrishnan, N., Khodabakhshi, A. H., Wong, C., and Lee, K., flowStats: Statistical methods for the analysis of flow cytometry data. R package version 3.38.0. (2018).
17. Csardi, G. and Nepusz, T., *InterJournal, Complex Systems* **1695** (5), 1 (2006).
18. Jiang, M., ggcyto: Visualize Cytometry data with ggplot. R package version 1.8.0 (2015).
19. Wilke, C. O., ggridges, Ridgeline Plots in 'ggplot2' (2018).
20. Wickham, H., *ggplot2: Elegant Graphics for Data Analysis*. (Springer-Verlag New York, 2016).
21. Wickham, H., *R Journal* **2** (2), 38 (2010).
22. Harrell, F. E. and Dupont, C., Hmisc: Harrell Miscellaneous (2019).
23. Kuhn, M., *J. Stat. Soft.* **28** (5) (2008).

## Supplemental Tables

**Table S1: Features used for Clustering.** (a) Features used for morphology-based analysis. (b) Features used for functional and morphology-based analysis in phagocytosis experiment.

Table S1 (a)

| Feature ID | Feature Name_ImageMask_Channel                    | Cell Intrinsic (CI) / Cell Function (CF) | Feature description                                                             |
|------------|---------------------------------------------------|------------------------------------------|---------------------------------------------------------------------------------|
| 1          | Area_AdaptiveErode_BF                             | CI                                       | Cell size                                                                       |
| 2          | Area_Intensity_SSC                                | CI                                       | Areas of SSC signal above background                                            |
| 3          | Area_Morphology_Draq5                             | CI                                       | Area of DNA signal (nuclear staining)                                           |
| 4          | Aspect.Ratio_AdaptiveErode_BF                     | CI                                       | Aspect ratio of total cell area                                                 |
| 5          | Bright.Detail.Intensity.R3_AdaptiveErode_BF_BF    | CI                                       | Intensity of brightest staining areas                                           |
| 6          | Bright.Detail.Intensity.R3_AdaptiveErode_BF_SSC   | CI                                       | Intensity of brightest signal areas                                             |
| 7          | Bright.Detail.Intensity.R3_AdaptiveErode_BF_Draq5 | CI                                       | Intensity of brightest staining areas                                           |
| 8          | Circularity_AdaptiveErode_BF                      | CI                                       | Circularity of whole cell shape                                                 |
| 9          | Circularity_Morphology_Draq5                      | CI                                       | Circularity of nucleus                                                          |
| 10         | Contrast_AdaptiveErode_BF_BF                      | CI                                       | Detects large changes in pixel values - can be measure of granularity of signal |
| 11         | Contrast_AdaptiveErode_BF_SSC                     | CI                                       | Detects large changes in pixel values - can be measure of granularity of signal |
| 12         | Diameter_AdaptiveErode_BF                         | CI                                       | Diameter of whole cell shape                                                    |
| 13         | Diameter_Morphology_Draq5                         | CI                                       | Diameter of nucleus                                                             |
| 14         | H.Energy.Mean_AdaptiveErode_BF_BF                 | CI                                       | Measure of intensity concentration - texture feature                            |
| 15         | H.Energy.Mean_Morphology_Draq5_Draq5              | CI                                       | Measure of intensity concentration - texture feature                            |
| 16         | H.Entropy.Mean_AdaptiveErode_BF_BF                | CI                                       | Measure of intensity concentration and randomness of signal - texture feature   |
| 17         | H.Entropy.Mean_Morphology_Draq5_Draq5             | CI                                       | Measure of intensity concentration and randomness of signal - texture feature   |
| 18         | Intensity_AdaptiveErode_BF_SSC                    | CI                                       | Integrated intensity of signal within whole cell mask - Cell granularity        |

|    |                                  |    |                                                                                       |
|----|----------------------------------|----|---------------------------------------------------------------------------------------|
| 19 | Intensity_AdaptiveErode_BF_Draq5 | CI | Integrated intensity of signal within whole cell mask                                 |
| 20 | Lobe.Count_Morphology_Draq5      | CI | Number of lobes of nucleus                                                            |
| 21 | Max.Pixel_Intensity_SSC          | CI | Maximum pixel intensity of stated channel within a whole cell mask - Cell granularity |
| 22 | Max.Pixel_Morphology_Draq5       | CI | Maximum pixel intensity of stated channel within a whole cell mask                    |
| 23 | Mean.Pixel_Morphology_Draq5      | CI | Mean pixel intensity of stated channel within a whole cell mask                       |
| 24 | Shape.Ratio_AdaptiveErode_BF     | CI | Minimum thickness divided by length - measure of cell shape characteristic            |
| 25 | Std.Dev_AdaptiveErode_BF         | CI | Standard deviation of BF signal - measure of granularity and variance in BF           |

Table S1 (b)

| Feature ID | Feature Name_ImageMask_Channel                    | Cell Intrinsic (CI) / Cell Function (CF) | Feature description                   |
|------------|---------------------------------------------------|------------------------------------------|---------------------------------------|
| 1          | Area_AdaptiveErode_BF                             | CI                                       | Cell size                             |
| 2          | Area_Intensity_DHR                                | CF                                       | Area of DHR staining above background |
| 3          | Area_Intensity_Bac                                | CF                                       | Area of CTV staining above background |
| 4          | Area_Intensity_SSC                                | CI                                       | Areas of SSC signal above background  |
| 5          | Area_Morphology_DNA                               | CI                                       | Area of DNA signal (nuclear staining) |
| 6          | Aspect.Ratio_AdaptiveErode_BF                     | CI                                       | Aspect ratio of total cell area       |
| 7          | Bright.Detail.Intensity.R3_AdaptiveErode_BF_Bac   | CF                                       | Intensity of brightest staining areas |
| 8          | Bright.Detail.Intensity.R3_AdaptiveErode_BF_BF    | CI                                       | Intensity of brightest staining areas |
| 9          | Bright.Detail.Intensity.R3_AdaptiveErode_BF_DHR   | CF                                       | Intensity of brightest staining areas |
| 10         | Bright.Detail.Intensity.R3_AdaptiveErode_BF_Draq5 | CI                                       | Intensity of brightest staining areas |
| 11         | Bright.Detail.Intensity.R3_AdaptiveErode_BF_SSC   | CI                                       | Intensity of brightest signal areas   |
| 12         | Circularity_AdaptiveErode_BF                      | CI                                       | Circularity of whole cell shape       |

|    |                                      |    |                                                                                       |
|----|--------------------------------------|----|---------------------------------------------------------------------------------------|
| 13 | Circularity_Morphology_DNA           | CI | Circularity of nucleus                                                                |
| 14 | Contrast_AdaptiveErode_BF_BF         | CI | Detects large changes in pixel values - can be measure of granularity of signal       |
| 15 | Contrast_AdaptiveErode_BF_SSC        | CI | Detects large changes in pixel values - can be measure of granularity of signal       |
| 16 | Diameter_AdaptiveErode_BF            | CI | Diameter of whole cell shape                                                          |
| 17 | Diameter_Morphology_Draq5            | CI | Diameter of nucleus                                                                   |
| 18 | H.Energy.Mean_AdaptiveErode_BF_BF    | CI | Measure of intensity concentration - texture feature                                  |
| 19 | H.Energy.Mean_Intensity_DHR_DHR      | CF | Measure of intensity concentration - texture feature                                  |
| 20 | H.Energy.Mean_Intensity_Bac_Bac      | CF | Measure of intensity concentration - texture feature                                  |
| 21 | H.Energy.Mean_Morphology_Draq5_Draq5 | CI | Measure of intensity concentration - texture feature                                  |
| 22 | H.Entropy.Mean_AdaptiveErode_BF_BF   | CI | Measure of intensity concentration and randomness of signal - texture feature         |
| 23 | H.Entropy.Mean_Intensity_DHR_DHR     | CF | Measure of intensity concentration and randomness of signal - texture feature         |
| 24 | H.Entropy.Mean_Intensity_Bac_Bac     | CF | Measure of intensity concentration and randomness of signal - texture feature         |
| 25 | H.Entropy.Mean_Morphology_DNA_Draq5  | CI | Measure of intensity concentration and randomness of signal - texture feature         |
| 26 | Intensity_AdaptiveErode_BF_Bac       | CF | Integrated intensity of signal within whole cell mask                                 |
| 27 | Intensity_AdaptiveErode_BF_DHR       | CF | Integrated intensity of signal within whole cell mask                                 |
| 28 | Intensity_AdaptiveErode_BF_Draq5     | CI | Integrated intensity of signal within whole cell mask                                 |
| 29 | Intensity_AdaptiveErode_BF_SSC       | CI | Integrated intensity of signal within whole cell mask - Cell granularity              |
| 30 | Lobe.Count_Morphology_Draq5          | CI | Number of lobes of nucleus                                                            |
| 31 | Max.Pixel_Intensity_Bac              | CF | Maximum pixel intensity of stated channel within a whole cell mask                    |
| 32 | Max.Pixel_Intensity_SSC              | CF | Maximum pixel intensity of stated channel within a whole cell mask - Cell granularity |
| 33 | Max.Pixel_Morphology_Draq5           | CI | Maximum pixel intensity of stated channel within a whole cell mask                    |
| 34 | Mean.Pixel_Morphology_Draq5          | CI | Mean pixel intensity of stated channel within a whole cell mask                       |
| 35 | Shape.Ratio_AdaptiveErode_BF         | CI | Minimum thickness divided by length - measure of cell shape characteristic            |
| 36 | Std.Dev_AdaptiveErode_BF             | CI | Standard deviation of BF signal - measure of granularity and variance in BF           |

**Table S2: Results of negative binomial regression analysis comparing clusters from zebrafish phagocytosis (Cells + CTV *S. aureus*) with CCB inhibition control (Cells + CTV *S. aureus* + CCB)**

| Cluster ID | logFC    | logCPM   | LR       | PValue   | FDR      |
|------------|----------|----------|----------|----------|----------|
| Dr1        | -2.48673 | 14.76127 | 24.65067 | 6.87E-07 | 1.19E-06 |
| Dr2        | -3.8209  | 15.11433 | 30.32912 | 3.65E-08 | 7.03E-08 |
| Dr3        | -2.63248 | 15.10065 | 30.25504 | 3.79E-08 | 7.03E-08 |
| Dr5        | -2.7606  | 14.21908 | 33.0875  | 8.81E-09 | 1.91E-08 |
| Dr6        | -2.70177 | 13.37119 | 36.16033 | 1.82E-09 | 4.73E-09 |
| Dr7        | -2.72126 | 14.24771 | 34.08437 | 5.28E-09 | 1.25E-08 |
| Dr8        | 4.482713 | 14.88169 | 82.05466 | 1.32E-19 | 4.92E-19 |
| Dr10       | -3.45902 | 14.60211 | 24.35992 | 7.99E-07 | 1.30E-06 |
| Dr11       | 6.904763 | 13.9128  | 84.08534 | 4.74E-20 | 2.05E-19 |
| Dr12       | 1.087279 | 12.83107 | 11.29997 | 0.000775 | 0.001061 |
| Dr13       | 1.514425 | 12.94985 | 11.48213 | 0.000703 | 0.001015 |
| Dr14       | -2.99602 | 11.50543 | 42.88105 | 5.82E-11 | 1.68E-10 |
| Dr15       | -2.38678 | 12.70026 | 21.12804 | 4.30E-06 | 6.57E-06 |
| Dr16       | 5.663379 | 14.13744 | 143.1863 | 5.35E-33 | 1.39E-31 |
| Dr17       | 5.715121 | 14.80998 | 122.2704 | 2.01E-28 | 2.62E-27 |
| Dr19       | 4.077533 | 14.85917 | 93.86068 | 3.39E-22 | 1.76E-21 |
| Dr20       | 3.847921 | 13.05544 | 49.27037 | 2.23E-12 | 7.25E-12 |
| Dr21       | 1.571314 | 11.87021 | 9.421178 | 0.002145 | 0.002788 |
| Dr23       | 4.375929 | 16.67274 | 99.99839 | 1.53E-23 | 9.91E-23 |
| Dr25       | 5.769772 | 13.99753 | 119.3218 | 8.90E-28 | 7.72E-27 |

**Table S3: Results of negative binomial regression analysis comparing clusters from zebrafish phagocytosis (Cells + CTV *S. aureus*) with ice inhibition control (Cells + CTV *S. aureus* + ice)**

| Cluster ID | logFC    | logCPM   | LR       | PValue   | FDR      |
|------------|----------|----------|----------|----------|----------|
| Dr1        | -2.57222 | 14.76127 | 26.21074 | 3.06E-07 | 2.65E-06 |
| Dr3        | -1.47929 | 15.10065 | 10.27905 | 0.001345 | 0.004998 |
| Dr5        | 1.235565 | 14.21908 | 6.9584   | 0.008343 | 0.023708 |
| Dr6        | -1.96681 | 13.37119 | 19.93869 | 8.00E-06 | 5.20E-05 |
| Dr7        | -1.93868 | 14.24771 | 18.19453 | 1.99E-05 | 0.000104 |
| Dr9        | 4.340935 | 11.68675 | 36.21393 | 1.77E-09 | 4.60E-08 |
| Dr12       | 0.836382 | 12.83107 | 6.799505 | 0.009118 | 0.023708 |
| Dr14       | -2.35912 | 11.50543 | 26.47869 | 2.66E-07 | 2.65E-06 |
| Dr15       | -1.67916 | 12.70026 | 10.80552 | 0.001012 | 0.004385 |
| Dr24       | 1.081904 | 16.03192 | 8.340688 | 0.003877 | 0.012599 |

**Table S4: Results of negative binomial regression analysis comparing clusters from apple snail phagocytosis (Cells + CTV *S. aureus*) with EDTA inhibition control (Cells + CTV *S. aureus* + EDTA)**

| Cluster ID | logFC    | logCPM   | LR       | PValue   | FDR      |
|------------|----------|----------|----------|----------|----------|
| 27426      | 1.219719 | 16.42389 | 23.86393 | 1.03E-06 | 4.14E-06 |
| 27427      | 1.521304 | 16.31424 | 23.42745 | 1.30E-06 | 4.32E-06 |
| 27430      | 3.506921 | 11.96025 | 19.19534 | 1.18E-05 | 2.62E-05 |
| 27431      | 2.000616 | 13.66811 | 21.45211 | 3.63E-06 | 9.07E-06 |
| 27432      | 1.178448 | 15.71918 | 15.65951 | 7.58E-05 | 0.000152 |
| 27433      | 0.912203 | 14.51336 | 5.608834 | 0.01787  | 0.023827 |
| 27434      | 1.919568 | 14.24789 | 21.7377  | 3.13E-06 | 8.93E-06 |
| 27435      | -0.95771 | 16.55159 | 15.15146 | 9.92E-05 | 0.00018  |
| 27436      | -2.21453 | 17.04466 | 66.60728 | 3.31E-16 | 6.63E-15 |
| 27437      | 1.920223 | 13.48376 | 27.01612 | 2.02E-07 | 1.01E-06 |
| 27438      | 1.155857 | 13.78276 | 11.69042 | 0.000628 | 0.000967 |
| 27439      | 1.742058 | 17.721   | 51.24411 | 8.16E-13 | 5.44E-12 |
| 27441      | 1.645859 | 13.23961 | 10.80603 | 0.001012 | 0.001445 |
| 27442      | 3.134689 | 13.98527 | 55.58824 | 8.94E-14 | 8.94E-13 |
| 27445      | -0.82885 | 16.67206 | 12.56812 | 0.000392 | 0.000654 |

**Table S5: Results of negative binomial regression analysis comparing clusters from apple snail phagocytosis (Cells + CTV *S. aureus*) with ice inhibition control (Cells + CTV *S. aureus* + ice)**

| Cluster ID | logFC    | logCPM   | LR       | PValue   | FDR      |
|------------|----------|----------|----------|----------|----------|
|            |          |          |          | 1.02E-09 | 2.03E-08 |
| 27442      | 2.500366 | 13.98527 | 37.29469 |          |          |
